# Supplementary material for: Modelling biomass burning emissions and the effect of spatial resolution: a case study for Africa based on the Global Fire Emissions Database (GFED)
Source: Copernicus journal article supplement (doi:10.5194/gmd-12-4681-2019), 2019-11-08
Supplement: Supplementary file [file gmd-12-4681-2019-supplement-title-page.pdf › gmd-12-4681-2019-supplement-title-page.pdf]

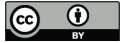

## *Supplement of*

# **Modelling biomass burning emissions and the effect of spatial resolution: a case study for Africa based on the Global Fire Emissions Database (GFED)**

**Dave van Wees and Guido R. van der Werf**

*Correspondence to:* Dave van Wees ([d.van.wees@vu.nl](mailto:d.van.wees@vu.nl))

- [gmd-12-4681-2019-supplement-title-page.pdf](#)
- [GMD\\_Supplement\\_analysis.py](#)
- [GMD\\_Supplement\\_dataread.py](#)
- [GMD\\_Supplement\\_executable.py](#)
- [GMD\\_Supplement\\_geospatial.py](#)
- [GMD\\_Supplement\\_model.py](#)

The copyright of individual parts of the supplement might differ from the CC BY 4.0 License.
